# Supplementary material for: The Unique Needs of Homeless Youths With Mental Illness: Baseline Findings From a Housing First Trial
Source: Atypon-hosted journal article supplement (doi:10.1176/appi.ps.201500461), 2016-06-01
Supplement: appi.ps.201500461.ds001.pdf [file appi.ps.201500461.ds001.pdf]

 


Psychiatry Online
