# Supplementary material for: The Unique Needs of Homeless Youths With Mental Illness: Baseline Findings From a Housing First Trial
Source: Atypon-hosted journal article supplement (doi:10.1176/appi.ps.201500461), 2016-06-01
Supplement: appi.ps.201500461.ds001.pdf [file appi.ps.201500461.ds001.pdf]

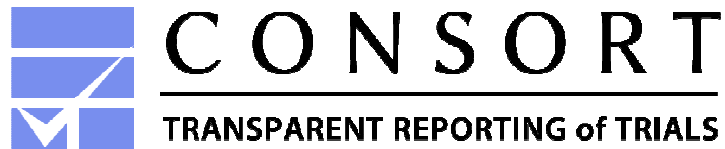

**CONSORT 2010 Flow Diagram**

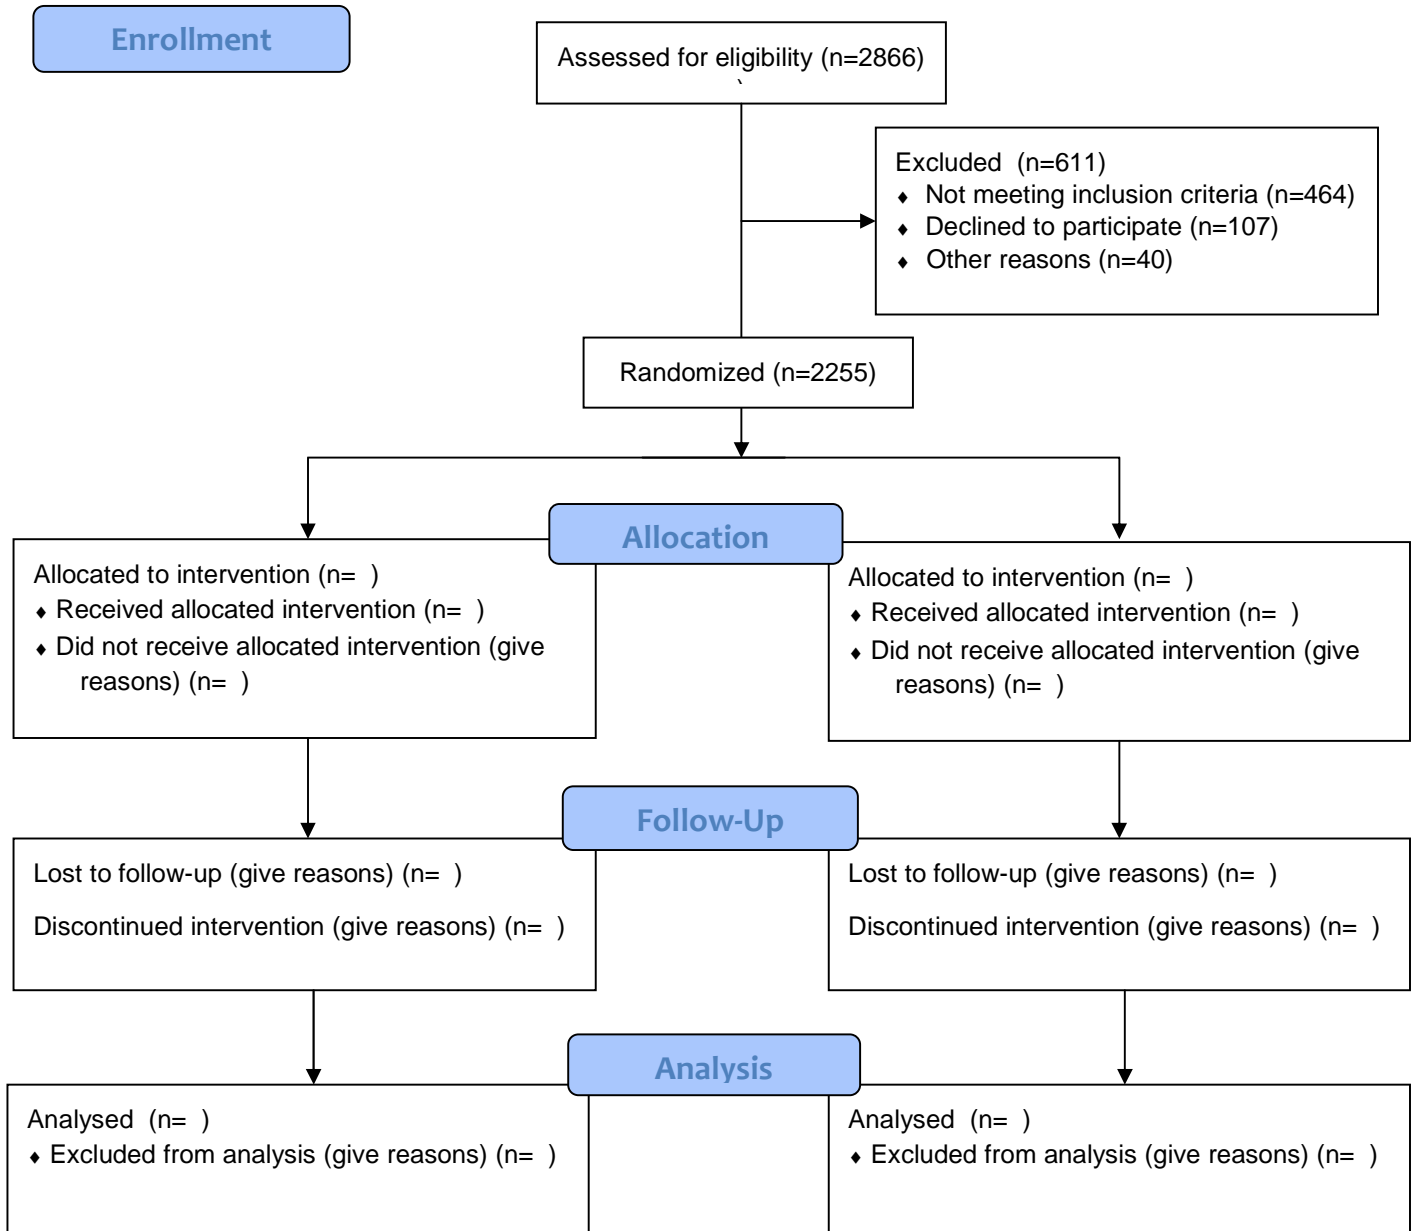

Online supplement

Supplemental Table 1: Definitions of inclusion and exclusion criteria (1)

| Term                           | Definition                                                                                                                                                                                                                                                                                                                                                                                                                                                                                                                                                                                                                                               |
|--------------------------------|----------------------------------------------------------------------------------------------------------------------------------------------------------------------------------------------------------------------------------------------------------------------------------------------------------------------------------------------------------------------------------------------------------------------------------------------------------------------------------------------------------------------------------------------------------------------------------------------------------------------------------------------------------|
| Absolutely homeless (included) | Describes people who lack regular physical shelter, with no fixed place to stay for more than 7 nights and little likelihood of obtaining permanent housing in the upcoming month. Includes individuals living rough in public or private places not normally used for sleeping accommodation for human beings (e.g., outside, on the streets, in parks or on the beach, in doorways, in parked vehicles, squats, or parking garages); those whose primary night-time residence was a supervised public or private emergency shelter or hostel; and those with no fixed address who were being discharged from a hospital, institution, prison, or jail. |
| Precariously housed (included) | Describes people whose primary residence is a Single Room Occupancy (SRO), rooming house or hotel/motel, with $\geq 2$ episodes of absolute homelessness in the past year.                                                                                                                                                                                                                                                                                                                                                                                                                                                                               |
| Relatively homeless (excluded) | Describes people whose regular housing fails to meet basic standards, such as 1) living in overcrowded or hazardous conditions; 2) residing informally/non-permanently with friends or relatives ("couch surfing"), 3) transitioning between housing (e.g., because of domestic abuse), 4) temporarily without dwelling (e.g. due to natural disaster or fire, marital separation or job loss) and 5) living in long-term institutions.                                                                                                                                                                                                                  |

References

1. Goering PN, Streiner DL, Adair C, et al: The At Home/Chez Soi trial protocol: A pragmatic, multi-site, randomised controlled trial of a Housing First intervention for homeless individuals with mental illness in five Canadian cities. *BMJ Open* 1:e000323-2011-000323. Print 2011
